# Supplementary material for: Structural basis of human SNAPc recognizing proximal sequence element of snRNA promoter
Source: PubMed Central journal article supplement (PMC9652321; doi:10.1038/s41467-022-34639-1), 2022-11-11
Supplement: 41467_2022_34639_MOESM2_ESM.pdf [file 41467_2022_34639_MOESM2_ESM.pdf]

## Reporting Summary

Nature Portfolio wishes to improve the reproducibility of the work that we publish. This form provides structure for consistency and transparency in reporting. For further information on Nature Portfolio policies, see our [Editorial Policies](#) and the [Editorial Policy Checklist](#).

### Statistics

For all statistical analyses, confirm that the following items are present in the figure legend, table legend, main text, or Methods section.

n/a Confirmed

- |                                     |                                     |                                                                                                                                                                                                                                                            |
|-------------------------------------|-------------------------------------|------------------------------------------------------------------------------------------------------------------------------------------------------------------------------------------------------------------------------------------------------------|
| <input type="checkbox"/>            | <input checked="" type="checkbox"/> | The exact sample size ( $n$ ) for each experimental group/condition, given as a discrete number and unit of measurement                                                                                                                                    |
| <input type="checkbox"/>            | <input checked="" type="checkbox"/> | A statement on whether measurements were taken from distinct samples or whether the same sample was measured repeatedly                                                                                                                                    |
| <input checked="" type="checkbox"/> | <input type="checkbox"/>            | The statistical test(s) used AND whether they are one- or two-sided<br><i>Only common tests should be described solely by name; describe more complex techniques in the Methods section.</i>                                                               |
| <input checked="" type="checkbox"/> | <input type="checkbox"/>            | A description of all covariates tested                                                                                                                                                                                                                     |
| <input checked="" type="checkbox"/> | <input type="checkbox"/>            | A description of any assumptions or corrections, such as tests of normality and adjustment for multiple comparisons                                                                                                                                        |
| <input type="checkbox"/>            | <input checked="" type="checkbox"/> | A full description of the statistical parameters including central tendency (e.g. means) or other basic estimates (e.g. regression coefficient) AND variation (e.g. standard deviation) or associated estimates of uncertainty (e.g. confidence intervals) |
| <input checked="" type="checkbox"/> | <input type="checkbox"/>            | For null hypothesis testing, the test statistic (e.g. $F$ , $t$ , $r$ ) with confidence intervals, effect sizes, degrees of freedom and $P$ value noted<br><i>Give <math>P</math> values as exact values whenever suitable.</i>                            |
| <input checked="" type="checkbox"/> | <input type="checkbox"/>            | For Bayesian analysis, information on the choice of priors and Markov chain Monte Carlo settings                                                                                                                                                           |
| <input checked="" type="checkbox"/> | <input type="checkbox"/>            | For hierarchical and complex designs, identification of the appropriate level for tests and full reporting of outcomes                                                                                                                                     |
| <input checked="" type="checkbox"/> | <input type="checkbox"/>            | Estimates of effect sizes (e.g. Cohen's $d$ , Pearson's $r$ ), indicating how they were calculated                                                                                                                                                         |

*Our web collection on [statistics for biologists](#) contains articles on many of the points above.*

### Software and code

Policy information about [availability of computer code](#)

|                 |                                                                                                                                                                                         |
|-----------------|-----------------------------------------------------------------------------------------------------------------------------------------------------------------------------------------|
| Data collection | SerialEM 3.8                                                                                                                                                                            |
| Data analysis   | MotionCor2 1.4.0, CTFFIND4 4.1.8, cryoSPARC 3.2.0, Relion 3.1.1, Chimera 1.15, Coot 0.8.9.1, Pymol 1.7.4.2, Phenix 1.18.2, ChimeraX 1.3, AlphaFold v2.1.0, Amber 14.0, AmberTools 15.0. |

For manuscripts utilizing custom algorithms or software that are central to the research but not yet described in published literature, software must be made available to editors and reviewers. We strongly encourage code deposition in a community repository (e.g. GitHub). See the Nature Portfolio [guidelines for submitting code & software](#) for further information.

### Data

Policy information about [availability of data](#)

All manuscripts must include a [data availability statement](#). This statement should provide the following information, where applicable:

- Accession codes, unique identifiers, or web links for publicly available datasets
- A description of any restrictions on data availability
- For clinical datasets or third party data, please ensure that the statement adheres to our [policy](#)

The atomic coordinates have been deposited in the Protein Data Bank (<http://www.rcsb.org>) with the access code 7XUR, and the EM maps have been deposited in EMDDB (<https://www.ebi.ac.uk/pdbe/emdb/>) with the accession code EMD-33477. All data in this study are included in this Article and its Supplementary Information. Source data are also provided with this paper.

## Human research participants

Policy information about [studies involving human research participants and Sex and Gender in Research](#).

|                             |                |
|-----------------------------|----------------|
| Reporting on sex and gender | Not applicable |
| Population characteristics  | Not applicable |
| Recruitment                 | Not applicable |
| Ethics oversight            | Not applicable |

Note that full information on the approval of the study protocol must also be provided in the manuscript.

## Field-specific reporting

Please select the one below that is the best fit for your research. If you are not sure, read the appropriate sections before making your selection.

Life sciences  Behavioural & social sciences  Ecological, evolutionary & environmental sciences

For a reference copy of the document with all sections, see [nature.com/documents/nr-reporting-summary-flat.pdf](https://www.nature.com/documents/nr-reporting-summary-flat.pdf)

## Life sciences study design

All studies must disclose on these points even when the disclosure is negative.

|                 |                                                                                                                                                                                                                                |
|-----------------|--------------------------------------------------------------------------------------------------------------------------------------------------------------------------------------------------------------------------------|
| Sample size     | Biochemical experiments were performed in biological triplicates (n=3) in order to allow for the calculation of mean values and the standard error of the mean.                                                                |
| Data exclusions | No data were excluded.                                                                                                                                                                                                         |
| Replication     | Biochemical experiments were repeated independently three times with similar results.                                                                                                                                          |
| Randomization   | No randomization was conducted as no decisions about inclusion or exclusion of data were taken and experiments were designed such that single parameters were varied during the experiment. All data was included in analysis. |
| Blinding        | No blinding was conducted as no subjective decisions about data inclusion were involved in data collection.                                                                                                                    |

## Reporting for specific materials, systems and methods

We require information from authors about some types of materials, experimental systems and methods used in many studies. Here, indicate whether each material, system or method listed is relevant to your study. If you are not sure if a list item applies to your research, read the appropriate section before selecting a response.

### Materials & experimental systems

| n/a                                 | Involved in the study                                     |
|-------------------------------------|-----------------------------------------------------------|
| <input type="checkbox"/>            | <input checked="" type="checkbox"/> Antibodies            |
| <input type="checkbox"/>            | <input checked="" type="checkbox"/> Eukaryotic cell lines |
| <input checked="" type="checkbox"/> | <input type="checkbox"/> Palaeontology and archaeology    |
| <input checked="" type="checkbox"/> | <input type="checkbox"/> Animals and other organisms      |
| <input checked="" type="checkbox"/> | <input type="checkbox"/> Clinical data                    |
| <input checked="" type="checkbox"/> | <input type="checkbox"/> Dual use research of concern     |

### Methods

| n/a                                 | Involved in the study                           |
|-------------------------------------|-------------------------------------------------|
| <input checked="" type="checkbox"/> | <input type="checkbox"/> ChIP-seq               |
| <input checked="" type="checkbox"/> | <input type="checkbox"/> Flow cytometry         |
| <input checked="" type="checkbox"/> | <input type="checkbox"/> MRI-based neuroimaging |

## Antibodies

|                 |                                                                                                                                                                                                                                                                                                                                                                                                                                                                                              |
|-----------------|----------------------------------------------------------------------------------------------------------------------------------------------------------------------------------------------------------------------------------------------------------------------------------------------------------------------------------------------------------------------------------------------------------------------------------------------------------------------------------------------|
| Antibodies used | <p>Primary antibodies: Mouse Monoclonal ANTI-FLAG® M2 antibody (Sigma-Aldrich, Cat#F3156, 1:400); Mouse Monoclonal StrepMAB-Classic HRP conjugate (IBA, Cat#2-1509-002, 1:10000); Rabbit TEV Cleavage Site Polyclonal Antibody (Thermo Fisher, Cat#PA1-119, 1:1000); Rabbit BR2 Polyclonal antibody (Proteintech, Cat#12056-1-AP, 1:1000).</p> <p>Secondary antibodies: Goat anti-rabbit IgG-HRP (Absin, Cat#abs20002, 1:10000); Goat anti-mouse IgG-HRP (Absin, Cat#abs20001, 1:10000).</p> |
| Validation      | 1. Mouse Monoclonal ANTI-FLAG M2 antibody (Sigma-Aldrich, F3156) was validated by manufacturer to detect Flag-tagged fusion                                                                                                                                                                                                                                                                                                                                                                  |

proteins (<https://www.sigmaaldrich.cn/CN/zh/product/sigma/f3165>).

2. Mouse Monoclonal StrepMAB-Classic HRP conjugate (IBA, 2-1509-002) was validated by manufacturer to detect Strep-tag fusion proteins (<https://www.iba-lifesciences.com/strepmab-classic-hrp-conjugate/2-1509-001>).

3. Rabbit TEV Cleavage Site Polyclonal Antibody (Thermo Fisher, PA1-119) was validated by manufacturer to detect TEV cleavage site in fusion proteins (<https://www.thermofisher.cn/cn/zh/antibody/product/TEV-Cleavage-Site-Antibody-Polyclonal/PA1-119>).

4. Rabbit BRF2 Polyclonal antibody (Proteintech, 12056-1-AP,) was validated by manufacturer to detect Brf2 protein (<https://www.ptgcn.com/products/BRF2-Antibody-12056-1-AP.htm>)

5. Secondary antibodies were validated by manufacturer following these links. (<https://www.absin.cn/goat-rabbit-igg-hrp/abs20002.html>; <https://www.absin.cn/goat-mouse-igg-hrp/abs20001.html>)

## Eukaryotic cell lines

Policy information about [cell lines and Sex and Gender in Research](#)

|                                                                      |                                                                                      |
|----------------------------------------------------------------------|--------------------------------------------------------------------------------------|
| Cell line source(s)                                                  | The sf9 insect cells (Novagen) were used for protein expression in this study.       |
| Authentication                                                       | The cell was routinely maintained in our laboratory. The cell was not authenticated. |
| Mycoplasma contamination                                             | The cell line was test negative for mycoplasma contamination.                        |
| Commonly misidentified lines<br>(See <a href="#">ICLAC</a> register) | No commonly misidentified cell lines were used.                                      |
